# Supplementary material for: Minimal disease activity and remission in patients with psoriatic arthritis with elevated body mass index: an observational cohort study in the Swiss Clinical Quality Management cohort
Source: PubMed Central journal article supplement — BMJ Open. 2022 Sep 16;12(9):e061474. doi: 10.1136/bmjopen-2022-061474 (PMC9486340; doi:10.1136/bmjopen-2022-061474), 2022-09-16
Supplement: bmjopen-2022-061474supp001.pdf [file bmjopen-2022-061474supp001.pdf]

## Supplementary material

### Minimal Disease Activity and remission in psoriatic arthritis patients with elevated body mass index: an observational cohort study in the Swiss Clinical Quality Management cohort

Enriqueta Vallejo-Yagüe<sup>1</sup>, Theresa Burkard<sup>1</sup>, Raphael Micheroli<sup>2</sup>, Andrea M. Burden<sup>1</sup>

<sup>1</sup> Institute of Pharmaceutical Sciences, Department of Chemistry and Applied Biosciences, ETH Zurich, Zurich, Switzerland.

<sup>2</sup> Department of Rheumatology, University Hospital of Zurich, University of Zurich, Zurich, Switzerland.

#### Supplementary Equations

$$(1) \text{ BMI} = \frac{\text{weight Kg}}{\text{height m}^2}$$

$$(2) \text{ DAPSA} = \text{sjc66} + \text{tjc68} + \text{PatActivity} + \text{PatPain} + \text{CRP}$$

$$(3) \text{ cDAPSA} = \text{sjc66} + \text{tjc68} + \text{PatActivity} + \text{PatPain}$$

$$(4) \text{ DAS28ESR} = (0.56 \times \sqrt{\text{tjc28}} + 0.28 \times \sqrt{\text{sjc28}} + 0.7 \times \ln(\text{ESR})) \times 1.08 + 0.16$$

$$(5) \text{ DAS28CRP} = (0.56 \times \sqrt{\text{tjc28}} + 0.28 \times \sqrt{\text{sjc28}} + 0.36 \times \ln(\text{CRP} + 1)) \times 1.10 + 1.15$$

Abbreviations used in the above equations: DAPSA disease activity in psoriasis arthritis score; cDAPSA clinical DAPSA; DAS28 disease activity score 28; sjc66 number of swollen joints, counting 66; sjc28 number of swollen joints, counting 28; tjc68 number of tender joints, counting 68; tjc28 number of tender joints, counting 28; CRP C-reactive protein (mg/dL); ESR erythrocyte sedimentation rate (mm/h); PatActivity patient's assessment of disease activity (0 very well - 10 very poor); PatPain patient's joint pain (0 very well - 10 very poor).

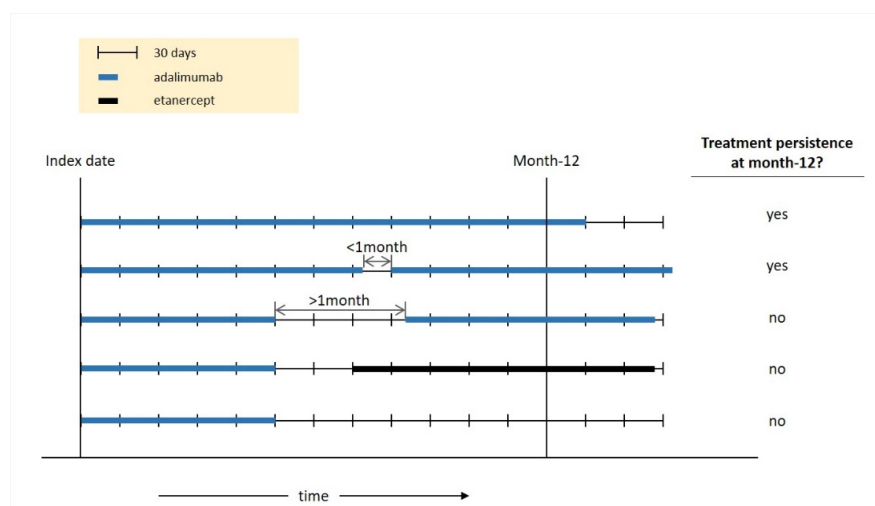

**Supplementary Figure S1.** Graphical representation of the assessment of treatment persistence at month-12 for an example patient who starts adalimumab as first biologic or targeted synthetic disease-modifying anti-rheumatic drug (b/tsDMARD).

**Supplementary Text S1.** Additional information on covariates.

High education was defined as '*höhere Fachschule*' (university of applied sciences), or '*Universitätsstudium*' (university study); and the no category for this variable was defined by '*obligatorische Schule*' (compulsory school), '*Berufslehre*' (apprenticeship), or '*Maturitätsschule*' (3-4 year high school that enables direct admission to Universities school)'.

Smoker (ever smoker) was defined by at least one record of smoker prior index date.

Patient and physician assessments on disease activity, pain, or skin manifestations, as well as medication, disease specific manifestations (musculoskeletal manifestations, dactylitis, enthesitis, sacrolitis, spinal involvement, coxitis, peripheral arthritis, nail manifestations) and comorbidities are recorded as specific variables in SCQM.

Information on comorbidities was extracted from the SCQM health issues dataset or table, which contains patient reported information. Lack of disease or health issue was assumed unless otherwise stated. Cardiovascular event/disease included cerebrovascular disease, coronary heart disease, deep vein thrombosis, heart infarct, heart insufficiency, peripheral vascular disease, pulmonary embolism, hypertension, hypotension, other cardiovascular disease, and other heart disease, ever before the index date. Diabetes included type I and type II, ever before index date. Other metabolic problems included adrenal disease, thyroid disease, diseases of other endocrine glands, dysfunctions of water electrolyte balance or acid alkaline balance, hyperlipidaemia, and hyperuricemia, within the 6-months prior index date. Depression/anxiety includes depression and anxiety, within the 6-months prior index date.

Supplementary Table S1. Variables included in the multiple imputation.

| Variable                                                       | Version 1 Included | Version 2 Included | Predicted | Predictor        | Method                          | Missingness | Levels                                                                                             | Range         |
|----------------------------------------------------------------|--------------------|--------------------|-----------|------------------|---------------------------------|-------------|----------------------------------------------------------------------------------------------------|---------------|
| Outcome <sup>a</sup><br>(MDA/DAPSArem/DAPSAremLDA/Persistence) | yes                | -                  | -         | yes              | -                               | -           | yes; no.                                                                                           | -             |
| Outcome <sup>a</sup> (DAS28rem)                                | -                  | yes                | -         | yes              | -                               | -           | yes; no.                                                                                           | -             |
| Patient ID                                                     | yes                | yes                | -         | -                | -                               | -           | -                                                                                                  | 1-774         |
| BMI category                                                   | yes                | yes                | -         | -                | -                               | -           | normal weight;<br>overweight;<br>obese.                                                            | -             |
| BMI kg/m <sup>2</sup>                                          | yes                | yes                | -         | yes              | -                               | -           | -                                                                                                  | 16.56 - 51.42 |
| Sex                                                            | yes                | yes                | -         | yes              | -                               | -           | female (women);<br>male (men).                                                                     | -             |
| Age                                                            | yes                | yes                | -         | yes              | -                               | -           | -                                                                                                  | 18.37 - 84.65 |
| Disease duration, years                                        | yes                | yes                | yes       | yes              | pmm                             | 17 (2.20)   | -                                                                                                  | 0.04 - 47.31  |
| High education                                                 | yes                | yes                | yes       | yes              | logreg                          | 146 (18.86) | yes; no.                                                                                           | -             |
| ESR mm/h                                                       | yes                | yes                | yes       | yes              | pmm                             | 105 (13.57) | -                                                                                                  | 1 - 110       |
| CRP mg/dL                                                      | yes                | yes                | yes       | yes              | pmm                             | 127 (16.41) | -                                                                                                  | 0 - 11.10     |
| Physician's global disease activity (0-10)                     | yes                | yes                | yes       | yes              | pmm                             | 31 (4.01)   | -                                                                                                  | 0 - 9         |
| Physician's global skin manifestation                          | yes                | yes                | yes       | yes              | polyreg                         | 61 (7.88)   | none;<br>almost none;<br>mild;<br>mild to moderate;<br>moderate;<br>moderate to severe;<br>severe. | -             |
| Patient's assessment on disease activity (0-10) (PatActv)      | yes                | yes                | yes       | yes              | pmm                             | 185 (23.90) | -                                                                                                  | 0 - 10        |
| Patient's joint pain (0-10) (PatPain)                          | yes                | yes                | yes       | yes              | pmm                             | 174 (22.48) | -                                                                                                  | 0 - 10        |
| Number of swollen joints 28 (sjc28)                            | yes                | yes                | yes       | yes              | pmm                             | 20 (2.58)   | -                                                                                                  | 0 - 22        |
| Number of swollen joints 66 (sjc66)                            | yes                | yes                | yes       | yes              | pmm                             | 72 (9.30)   | -                                                                                                  | 0 - 48        |
| Number of tender joints 28 (tjc28)                             | yes                | yes                | yes       | yes              | pmm                             | 28 (3.62)   | -                                                                                                  | 0 - 28        |
| Number of tender joints 68 (tjc68)                             | yes                | yes                | yes       | yes              | pmm                             | 73 (9.43)   | -                                                                                                  | 0 - 68        |
| DAPSA                                                          | yes                | -                  | yes       | yes <sup>b</sup> | passive imputation <sup>d</sup> | 298 (38.5)  | -                                                                                                  | 0.10 - 121    |
| DAS28                                                          | -                  | yes                | yes       | yes <sup>c</sup> | passive imputation <sup>e</sup> | 99 (12.79)  | -                                                                                                  | 0.20 - 7.60   |
| HAQ (0-3)                                                      | yes                | yes                | yes       | yes              | pmm                             | 167 (21.58) | -                                                                                                  | 0 - 3         |
| SF-12mcs (0-100)                                               | yes                | yes                | yes       | yes              | pmm                             | 206 (26.61) | -                                                                                                  | 18.74-67.78   |
| SF-12pcus (0-100)                                              | yes                | yes                | yes       | yes              | pmm                             | 206 (26.61) | -                                                                                                  | 16.74-61.25   |
| b/tsDMARD                                                      | yes                | yes                | -         | yes              | -                               | -           | TNFi biologic;<br>other biologic;<br>tsDMARD.                                                      | -             |
| csDMARD at index                                               | yes                | yes                | -         | yes              | -                               | -           | yes; no.                                                                                           | -             |
| Prednisone at index                                            | yes                | yes                | -         | yes              | -                               | -           | yes; no.                                                                                           | -             |
| Dactylitis                                                     | yes                | yes                | -         | yes              | -                               | -           | yes; no.                                                                                           | -             |
| Sacroiliitis                                                   | yes                | yes                | -         | yes              | -                               | -           | yes; no.                                                                                           | -             |
| Enthesitis                                                     | yes                | yes                | -         | yes              | -                               | -           | yes; no.                                                                                           | -             |
| Spinal involvement                                             | yes                | yes                | -         | yes              | -                               | -           | yes; no.                                                                                           | -             |
| Coxitis                                                        | yes                | yes                | -         | yes              | -                               | -           | yes; no.                                                                                           | -             |
| Dactylitis                                                     | yes                | yes                | -         | yes              | -                               | -           | yes; no.                                                                                           | -             |

Abbreviations: BMI body mass index; ESR erythrocyte sedimentation rate; CRP C-reactive protein; PsA psoriasis arthritis; MDA Minimal Disease Activity; DAPSA Disease Activity Index for Psoriatic Arthritis; DAS28 28-joint disease activity score; HAQ Health Assessment Questionnaire; b/tsDMARD biologic or targeted synthetic disease modifying anti-rheumatic drug; csDMARD conventional synthetic disease modifying anti-rheumatic drug; TNFi tumor necrosis factor alpha inhibitor; tsDMARD targeted synthetic disease modifying anti-rheumatic drug; pmm predictive mean matching; logit logistic regression; polyreg polytomous logistic regression.

<sup>a</sup> Multiple imputation was run distinctly for each outcome.

<sup>b</sup> DAPSA not used as predictor for: sjc66, tjc68, PatActivity, PatPain, CRP.

<sup>c</sup> DAS28 not used as predictor for: sjc28, tjc28, ESR.

<sup>d</sup> DAPSA passive imputation:  $DAPSA = sjc66 + tjc68 + PatActivity + PatPain + CRP$

<sup>e</sup> DAS28 passive imputation:  $DAS28ESR = (0.56 \times \sqrt{tjc28} + 0.28 \times \sqrt{sjc28} + 0.7 \times \ln(ESR)) \times 1.08 + 0.16$

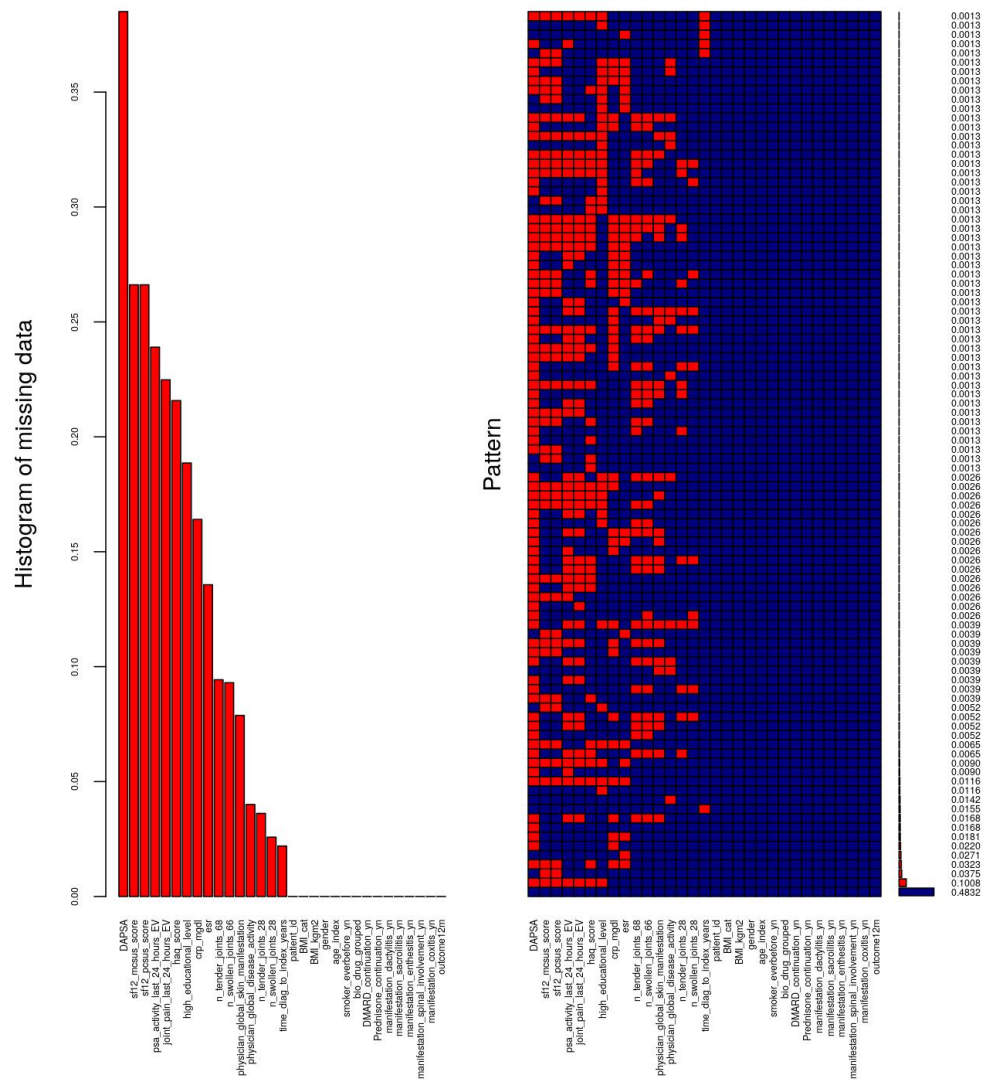

**Supplementary Figure S2.** Graphical representation of the missingness among baseline variables included in the imputations for primary analysis (i.e., achievement of Minimal Disease Activity (MDA) within the first year after index date). The 48.32% of patients had complete information on all the included variables. In the right figure, blue indicates availability of the data, and red missingness.

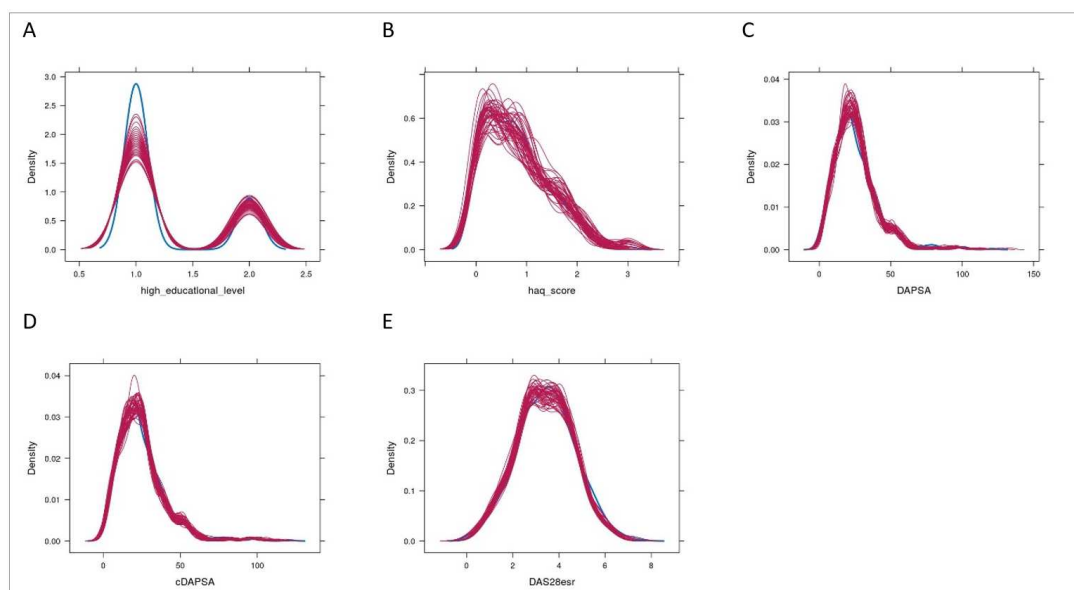

**Supplementary Figure S3.** Density plots for the imputed variables high educational level [A], Health Assessment Questionnaire (HAQ) [B], and Disease Activity Index for Psoriatic Arthritis (DAPSA) [C] for the primary outcome, achievement of Minimal Disease Activity (MDA) within the first year after index date. Additionally, density plot for the imputed clinical DAPSA (cDAPSA) [D] and 28-joint disease activity score (DAS28) [E] for the secondary outcomes cDAPSA-remission and DAS28-remission within the first year of treatment, respectively. The variable distribution in the original dataset is shown in blue, and the corresponding distribution in each imputed dataset is shown in red.

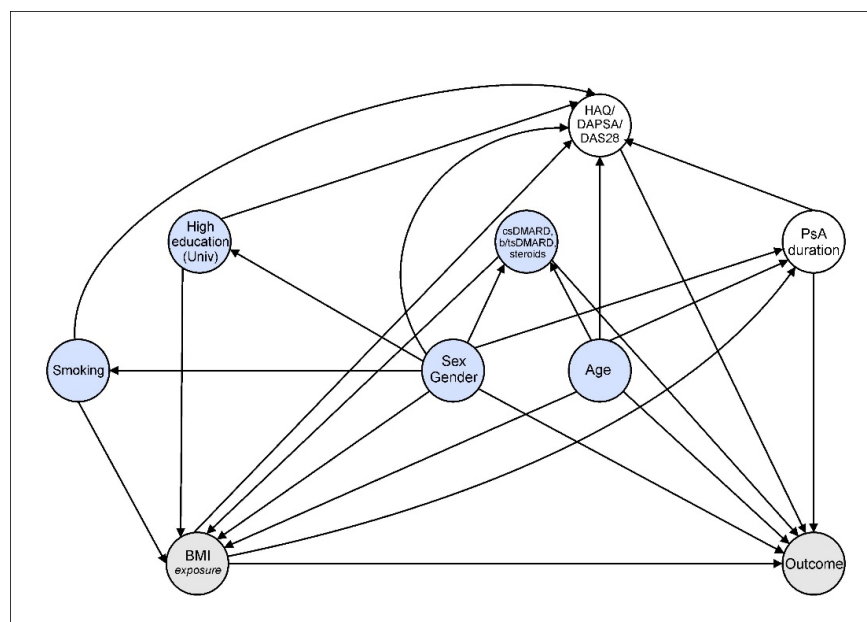

**Supplementary Figure S4.** Direct acyclic graph (DAG) displaying the clinical rationale for selection of confounders. The nodes represent the exposure, outcome and covariates, and the lines or edges represent the assumed relationship between them. Grey nodes represent the exposure and the outcome. Blue nodes represent the confounders included in the study full adjusted model. White nodes represent other variables included in sensitivity analyses.

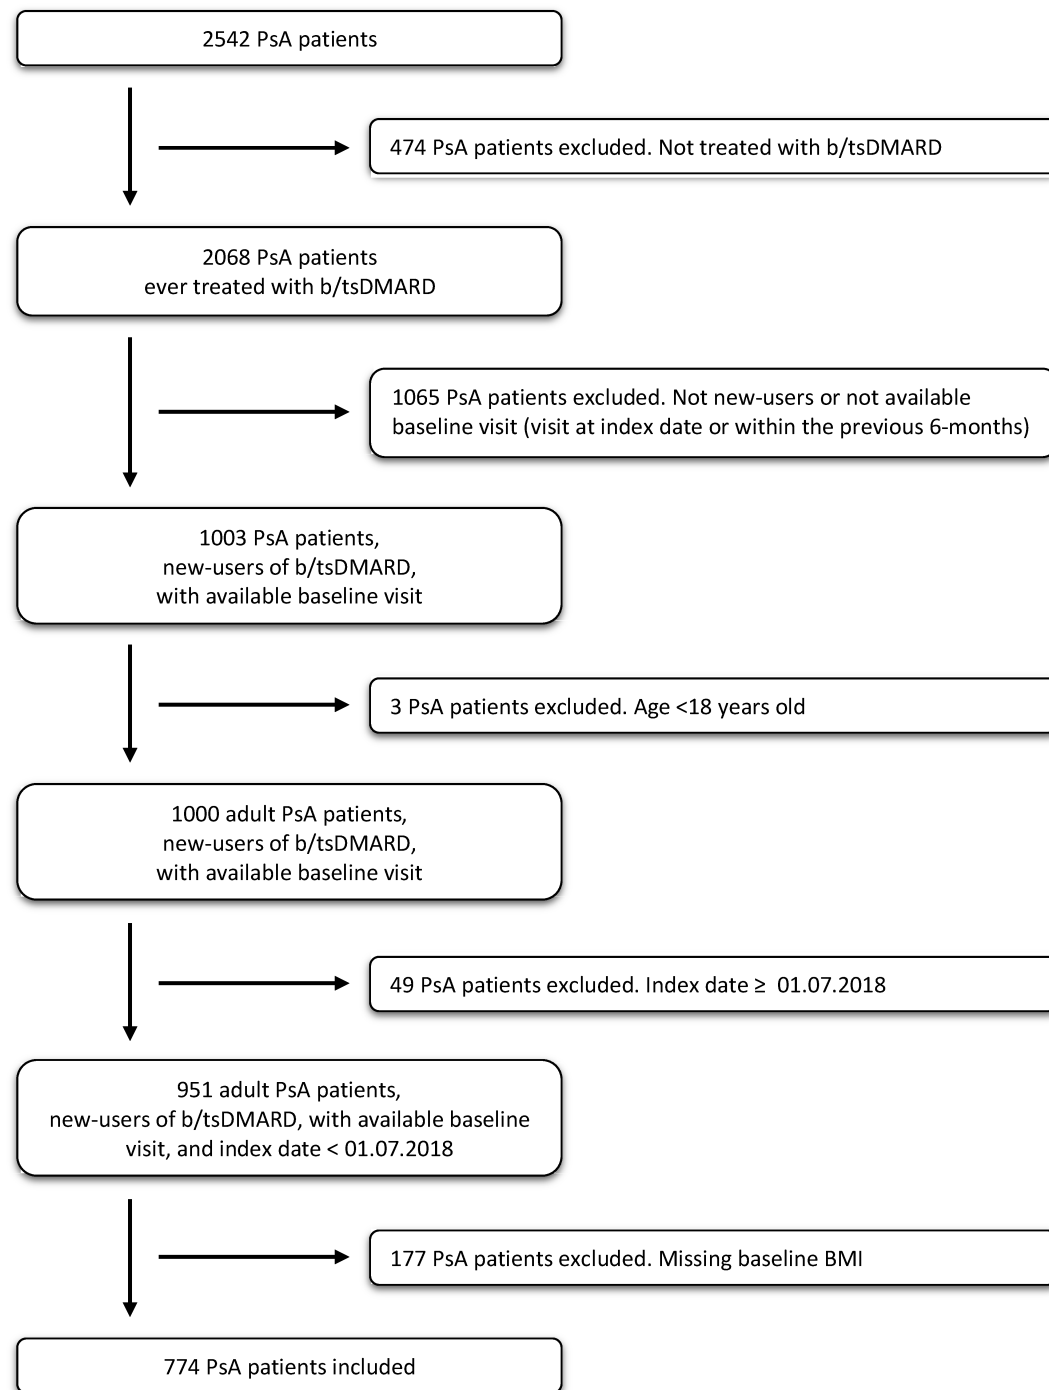

**Supplementary Figure S5.** Flow chart reflecting the cohort selection based on inclusion and exclusion criteria.

**Supplementary Table S2.** Sensitivity analyses, including the respective composite disease activity score or health standardised survey in the multivariable logistic regression of each study outcome.

|                              | n sample size | Maximum follow-up 9-months |                             | Maximum follow-up 12-months |                             | Maximum follow-up 15-months |                             |
|------------------------------|---------------|----------------------------|-----------------------------|-----------------------------|-----------------------------|-----------------------------|-----------------------------|
|                              |               | n events                   | ORadj <sup>c</sup> (95% CI) | n events                    | ORadj <sup>c</sup> (95% CI) | n events                    | ORadj <sup>c</sup> (95% CI) |
| <b>MDA</b>                   |               |                            |                             |                             |                             |                             |                             |
| Normal weight                | 306           | 45 (14.7)                  | 1 (ref.)                    | 66 (21.6)                   | 1 (ref.)                    | 86 (28.1)                   | 1 (ref.)                    |
| Overweight                   | 285           | 21 (7.4)                   | 0.67 (0.35-1.29)            | 40 (14.0)                   | 0.69 (0.42-1.15)            | 61 (21.4)                   | 0.85 (0.54-1.36)            |
| Obese                        | 183           | 12 (6.6)                   | 0.47 (0.19-1.14)            | 19 (10.4)                   | 0.48 (0.25-0.96)            | 30 (16.4)                   | 0.72 (0.4-1.27)             |
| <b>DAPSA-remission</b>       |               |                            |                             |                             |                             |                             |                             |
| Normal weight                | 306           | 31 (10.1)                  | 1 (ref.)                    | 51 (16.7)                   | 1 (ref.)                    | 67 (21.9)                   | 1 (ref.)                    |
| Overweight                   | 285           | 11 (3.9)                   | 0.7 (0.29-1.72)             | 20 (7.0)                    | 0.56 (0.28-1.1)             | 31 (10.9)                   | 0.6 (0.33-1.08)             |
| Obese                        | 183           | 8 (4.4)                    | 0.78 (0.28-2.17)            | 12 (6.6)                    | 0.49 (0.22-1.1)             | 17 (9.3)                    | 0.49 (0.24-1)               |
| <b>DAPSA-remLDA</b>          |               |                            |                             |                             |                             |                             |                             |
| Normal weight                | 306           | 47 (15.4)                  | 1 (ref.)                    | 84 (27.5)                   | 1 (ref.)                    | 117 (38.2)                  | 1 (ref.)                    |
| Overweight                   | 285           | 37 (13.0)                  | 0.91 (0.48-1.75)            | 76 (26.7)                   | 1.03 (0.63-1.69)            | 104 (36.5)                  | 0.79 (0.5-1.25)             |
| Obese                        | 183           | 22 (12.0)                  | 0.87 (0.41-1.85)            | 37 (20.2)                   | 0.68 (0.38-1.22)            | 52 (28.4)                   | 0.62 (0.36-1.04)            |
| <b>cDAPSA-remission</b>      |               |                            |                             |                             |                             |                             |                             |
| Normal weight                | 306           | 36 (11.8)                  | 1 (ref.)                    | 57 (18.6)                   | 1 (ref.)                    | 77 (25.2)                   | 1 (ref.)                    |
| Overweight                   | 285           | 22 (7.7)                   | 1.04 (0.51-2.13)            | 39 (13.7)                   | 0.91 (0.52-1.6)             | 53 (18.6)                   | 0.78 (0.47-1.29)            |
| Obese                        | 183           | 12 (6.6)                   | 0.72 (0.28-1.81)            | 16 (8.7)                    | 0.53 (0.25-1.11)            | 23 (12.6)                   | 0.57 (0.3-1.07)             |
| <b>DAS28-remission</b>       |               |                            |                             |                             |                             |                             |                             |
| Normal weight                | 306           | 68 (22.2)                  | 1 (ref.)                    | 115 (37.6)                  | 1 (ref.)                    | 153 (50.0)                  | 1 (ref.)                    |
| Overweight                   | 285           | 64 (22.5)                  | 1.13 (0.68-1.9)             | 109 (38.2)                  | 0.93 (0.6-1.43)             | 140 (49.1)                  | 0.93 (0.6-1.42)             |
| Obese                        | 183           | 29 (15.8)                  | 0.67 (0.36-1.27)            | 51 (27.9)                   | 0.62 (0.37-1.04)            | 70 (38.3)                   | 0.69 (0.42-1.13)            |
| <b>Treatment persistence</b> |               |                            |                             |                             |                             |                             |                             |
| Normal weight                | 306           | 204 (66.7)                 | 1 (ref.)                    | 183 (59.8)                  | 1 (ref.)                    | 159 (52.0)                  | 1 (ref.)                    |
| Overweight                   | 285           | 184 (64.6)                 | 0.92 (0.61-1.4)             | 161 (56.5)                  | 0.88 (0.59-1.3)             | 148 (51.9)                  | 1.04 (0.71-1.54)            |
| Obese                        | 183           | 111 (60.7)                 | 0.92 (0.56-1.49)            | 94 (51.4)                   | 0.92 (0.58-1.46)            | 81 (44.3)                   | 1.04 (0.66-1.64)            |

ORadj<sup>c</sup>: odds ratio adjusting for: sex, age, high educational level, smoker, b/tsDMARD, csDMARD, corticosteroid, and HAQ (for MDA) or DAPSA (for DAPSA-remission/DAPSA-remission/LDA) or DAS28 (for DAS28-remission).

Abbreviations: n number; CI confidence interval; ref. reference; MDA Minimal Disease Activity; DAPSA-remission Disease Activity for Psoriatic Arthritis remission; DAPSA-remLDA Disease Activity for Psoriatic Arthritis remission or low disease activity; cDAPSA-remission clinical Disease Activity for Psoriatic Arthritis remission; DAS28-remission 28-joint disease activity score remission.

**Supplementary Table S3.** Sensitivity analysis, excluding patients without follow-up data on outcome. Multivariable logistic regression for each study outcome.

|                         | Maximum follow-up 12-months, sensitivity analysis |            |                          |                             |                             |
|-------------------------|---------------------------------------------------|------------|--------------------------|-----------------------------|-----------------------------|
|                         | n sample size                                     | n events   | OR <sup>a</sup> (95% CI) | ORadj <sup>b</sup> (95% CI) | ORadj <sup>c</sup> (95% CI) |
| <b>MDA</b>              |                                                   |            |                          |                             |                             |
| Normal weight           | 130                                               | 66 (50.8)  | 1 (ref.)                 | 1 (ref.)                    | 1 (ref.)                    |
| Overweight              | 131                                               | 40 (30.5)  | 0.39 (0.23-0.66)         | 0.45 (0.25-0.80)            | 0.5 (0.26-0.93)             |
| Obese                   | 81                                                | 19 (23.5)  | 0.28 (0.15-0.53)         | 0.33 (0.16-0.67)            | 0.37 (0.17-0.81)            |
| <b>DAPSA-remission</b>  |                                                   |            |                          |                             |                             |
| Normal weight           | 113                                               | 51 (45.1)  | 1 (ref.)                 | 1 (ref.)                    | 1 (ref.)                    |
| Overweight              | 113                                               | 20 (17.7)  | 0.23 (0.12-0.43)         | 0.25 (0.12-0.49)            | 0.37 (0.16-0.82)            |
| Obese                   | 64                                                | 12 (18.8)  | 0.28 (0.13-0.59)         | 0.31 (0.14-0.71)            | 0.44 (0.17-1.13)            |
| <b>DAPSA-remLDA</b>     |                                                   |            |                          |                             |                             |
| Normal weight           | 113                                               | 84 (74.3)  | 1 (ref.)                 | 1 (ref.)                    | 1 (ref.)                    |
| Overweight              | 113                                               | 76 (67.3)  | 0.66 (0.37-1.19)         | 0.58 (0.3-1.12)             | 0.57 (0.26-1.29)            |
| Obese                   | 64                                                | 37 (57.8)  | 0.48 (0.25-0.92)         | 0.44 (0.21-0.93)            | 0.42 (0.17-1.04)            |
| <b>cDAPSA-remission</b> |                                                   |            |                          |                             |                             |
| Normal weight           | 124                                               | 57 (46.0)  | 1 (ref.)                 | 1 (ref.)                    | 1 (ref.)                    |
| Overweight              | 131                                               | 39 (29.8)  | 0.44 (0.26-0.75)         | 0.47 (0.26-0.85)            | 0.61 (0.31-1.21)            |
| Obese                   | 74                                                | 16 (21.6)  | 0.32 (0.16-0.63)         | 0.36 (0.17-0.75)            | 0.44 (0.19-1.04)            |
| <b>DAS28-remission</b>  |                                                   |            |                          |                             |                             |
| Normal weight           | 159                                               | 115 (72.3) | 1 (ref.)                 | 1 (ref.)                    | 1 (ref.)                    |
| Overweight              | 153                                               | 109 (71.2) | 0.86 (0.51-1.46)         | 0.55 (0.3-1.01)             | 0.57 (0.28-1.14)            |
| Obese                   | 89                                                | 51 (57.3)  | 0.48 (0.27-0.86)         | 0.3 (0.15-0.6)              | 0.37 (0.17-0.81)            |

OR: odds ratio adjusting for: sex, age;

ORadj: odds ratio adjusting for: sex, age, high educational level, smoker, b/tsDMARD, csDMARD, corticosteroid.

ORadj<sup>c</sup>: odds ratio adjusting for: sex, age, high educational level, smoker, b/tsDMARD, csDMARD, corticosteroid, and HAQ (for MDA) or DAPSA (for DAPSA-remission/DAPSA-remission/LDA) or DAS28 (for DAS28-remission).

Abbreviations: n number; CI confidence interval; ref. reference; Abbreviations: n number; CI confidence interval; ref. reference; MDA Minimal Disease Activity; DAPSA-remission Disease Activity for Psoriatic Arthritis remission; DAPSA-remLDA Disease Activity for Psoriatic Arthritis remission or low disease activity; cDAPSA-remission clinical Disease Activity for Psoriatic Arthritis remission; DAS28-remission 28-joint disease activity score remission

**Supplementary Table S4.** Sensitivity analyses, excluding the 12 patients with body mass index (BMI) <18.5 kg/m<sup>2</sup>. Result from the multivariable logistic regression investigating the association between body mass index (BMI) categories and various clinical outcomes, with maximum follow-up 12-months.

| Sensitivity analyses<br>(Excluding BMI<18.5)         | n<br>sample size | Maximum follow-up 12-months |                  |                  |
|------------------------------------------------------|------------------|-----------------------------|------------------|------------------|
|                                                      |                  | n<br>vents                  | OR               | ORadj            |
| <b>MDA</b>                                           |                  |                             |                  |                  |
| Normal weight                                        | 294              | 62 (21.1)                   | 1 (ref.)         | 1 (ref.)         |
| Overweight                                           | 285              | 40 (14.0)                   | 0.61 (0.39-0.95) | 0.65 (0.40-1.06) |
| Obese                                                | 183              | 19 (10.4)                   | 0.44 (0.25-0.77) | 0.45 (0.24-0.84) |
| <b>DAPSA-remission</b>                               |                  |                             |                  |                  |
| Normal weight                                        | 294              | 47 (16)                     | 1 (ref.)         | 1 (ref.)         |
| Overweight                                           | 285              | 20 (7.0)                    | 0.40 (0.23-0.70) | 0.46 (0.25-0.83) |
| Obese                                                | 183              | 12 (6.6)                    | 0.38 (0.20-0.75) | 0.43 (0.21-0.88) |
| <b>DAPSA-remLDA</b>                                  |                  |                             |                  |                  |
| Normal weight                                        | 294              | 80 (27.2)                   | 1 (ref.)         | 1 (ref.)         |
| Overweight                                           | 285              | 76 (26.7)                   | 0.96 (0.66-1.40) | 0.99 (0.65-1.50) |
| Obese                                                | 183              | 37 (20.2)                   | 0.68 (0.44-1.06) | 0.70 (0.42-1.14) |
| <b>cDAPSA-remission</b>                              |                  |                             |                  |                  |
| Normal weight                                        | 294              | 294 (18)                    | 1 (ref.)         | 1 (ref.)         |
| Overweight                                           | 285              | 39 (13.7)                   | 0.72 (0.46-1.14) | 0.81 (0.49-1.33) |
| Obese                                                | 183              | 16 (8.7)                    | 0.45 (0.25-0.81) | 0.53 (0.28-1.00) |
| <b>DAS28-remission</b>                               |                  |                             |                  |                  |
| Normal weight                                        | 294              | 110 (37.4)                  |                  |                  |
| Overweight                                           | 285              | 109 (38.2)                  | 1.00 (0.71-1.42) | 0.89 (0.61-1.31) |
| Obese                                                | 183              | 51 (27.9)                   | 0.65 (0.44-0.98) | 0.51 (0.32-0.82) |
| <b>Treatment persistence at the end of follow-up</b> |                  |                             |                  |                  |
| Normal weight                                        | 294              | 179 (60.9)                  | 1 (ref.)         | 1 (ref.)         |
| Overweight                                           | 285              | 161 (56.5)                  | 0.81 (0.58-1.13) | 0.83 (0.56-1.23) |
| Obese                                                | 183              | 94 (51.4)                   | 0.68 (0.47-0.99) | 0.8 (0.52-1.24)  |

OR: odds ratio adjusting for: sex, age;

ORadj: odds ratio adjusting for: sex, age, high educational level, smoker, b/tsDMARD, csDMARD, corticosteroid.

Abbreviations: n number; CI confidence interval; ref. reference; MDA Minimal Disease Activity; DAPSA-remission Disease Activity for Psoriatic Arthritis (DAPSA) remission; DAPSA-remLDA DAPSA remission or low disease activity; cDAPSA-remission clinical DAPSA remission; DAS28-remission 28-joint disease activity score remission.



**Supplementary Table S5.** Number of patients, overall and stratified by body mass index (BMI) category, for each corresponding set of achieved outcomes within the first year. These numerical values complement the Figure 4 Venn Diagram. Each patient may achieve none, one, or more outcomes. Each row includes patients with the same set of achieved outcomes. The symbol ✓ indicates that the corresponding outcome (column-wise) was achieved. Conversely, the symbol – indicates that the corresponding outcome was not achieved. To obtain the total number of patients achieving a specific outcome, every column with the corresponding outcome marked as achieved should be sum.

| Achieved outcomes |          |             |           |          | Overall<br>(n=774)<br>(counts) | Normal weight<br>(n=306)<br>(counts) | Overweight<br>(n=285)<br>(counts) | Obese<br>(n=183)<br>(counts) |
|-------------------|----------|-------------|-----------|----------|--------------------------------|--------------------------------------|-----------------------------------|------------------------------|
| MDA               | DAPSArem | DAPSAremLDA | cDAPSArem | DAS28rem |                                |                                      |                                   |                              |
| ✓                 | -        | -           | -         | -        | 3                              | 1                                    | 1                                 | 1                            |
| ✓                 | -        | ✓           | -         | -        | 4                              | 2                                    | 2                                 | 0                            |
| ✓                 | -        | -           | -         | ✓        | 4                              | 2                                    | 0                                 | 2                            |
| ✓                 | -        | ✓           | -         | ✓        | 13                             | 7                                    | 5                                 | 1                            |
| ✓                 | -        | -           | ✓         | -        | 12                             | 2                                    | 8                                 | 2                            |
| ✓                 | -        | ✓           | ✓         | -        | 1                              | 0                                    | 1                                 | 0                            |
| ✓                 | -        | -           | ✓         | ✓        | 2                              | 2                                    | 0                                 | 0                            |
| ✓                 | -        | ✓           | ✓         | ✓        | 6                              | 2                                    | 3                                 | 1                            |
| ✓                 | ✓        | ✓           | ✓         | -        | 6                              | 3                                    | 2                                 | 1                            |
| ✓                 | ✓        | ✓           | ✓         | ✓        | 74                             | 45                                   | 18                                | 11                           |
| -                 | -        | ✓           | -         | -        | 15                             | 5                                    | 6                                 | 4                            |
| -                 | -        | -           | -         | ✓        | 98                             | 37                                   | 43                                | 18                           |
| -                 | -        | ✓           | -         | ✓        | 68                             | 17                                   | 33                                | 18                           |
| -                 | -        | ✓           | ✓         | -        | 1                              | 0                                    | 0                                 | 1                            |
| -                 | -        | -           | ✓         | ✓        | 1                              | 0                                    | 1                                 | 0                            |
| -                 | -        | ✓           | ✓         | ✓        | 6                              | 0                                    | 6                                 | 0                            |
| -                 | ✓        | ✓           | ✓         | ✓        | 3                              | 3                                    | 0                                 | 0                            |

Abbreviations: MDA minimal disease activity; DAPSArem Disease Activity for Psoriatic Arthritis remission; DAPSAremLDA Disease Activity for Psoriatic Arthritis remission or low disease activity; cDAPSArem clinical Disease Activity for Psoriatic Arthritis remission; DAS28rem 28-joint disease activity score remission.
